# Supplementary material for: A Tb3+ functionalized triazine-porous organic framework as a ratiometric fluorescent sensor for determination of ciprofloxacin in aquatic products
Source: Royal Society of Chemistry journal article supplement (doi:10.1039/d2nj03657f), 2022-01-01
Supplement: d2nj03657f1.pdf [file d2nj03657f1.pdf]

## Supplementary Information

### **Tb<sup>3+</sup> functionalized triazine-porous organic framework as a ratiometric fluorescence sensor for determination of ciprofloxacin in aquatic products**

Zhenyu Lu, Gongke Li\*, Yufei Hu\*

School of Chemistry, Sun Yat-sen University, Guangzhou 510006, China.

\*Corresponding Authors

E-mail: [cesgkl@mail.sysu.edu.cn](mailto:cesgkl@mail.sysu.edu.cn);

[huyufei@mail.sysu.edu.cn](mailto:huyufei@mail.sysu.edu.cn)

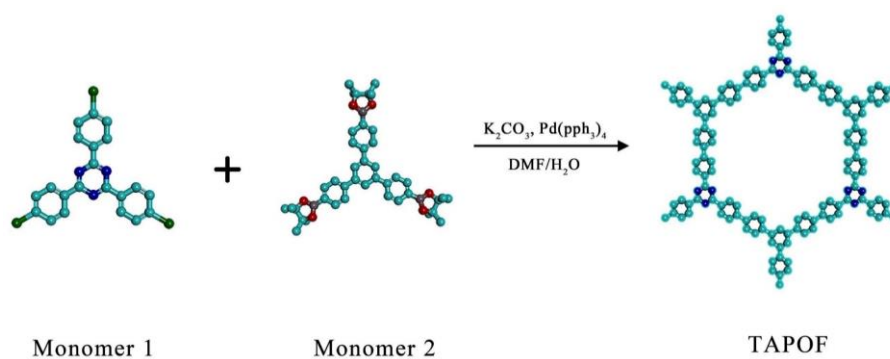

**Fig. S1** Synthesis routine of TAPOF

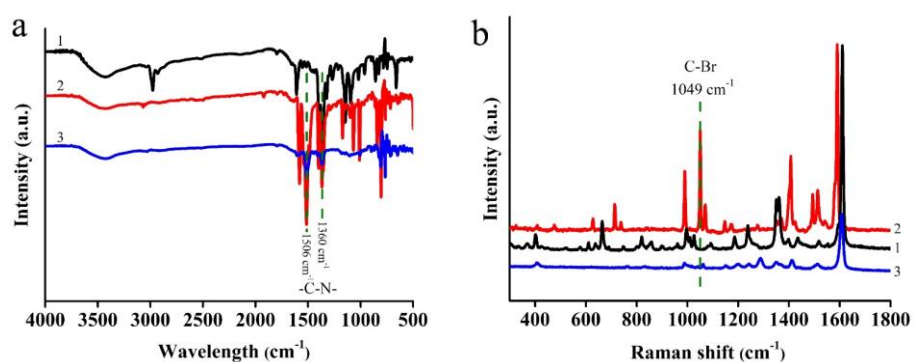

**Fig. S2** FT-IR spectra (a) and Raman spectra (b) of TAPOF (curve 1), monomer1 (curve 3) and monomer 2 (curve 2)

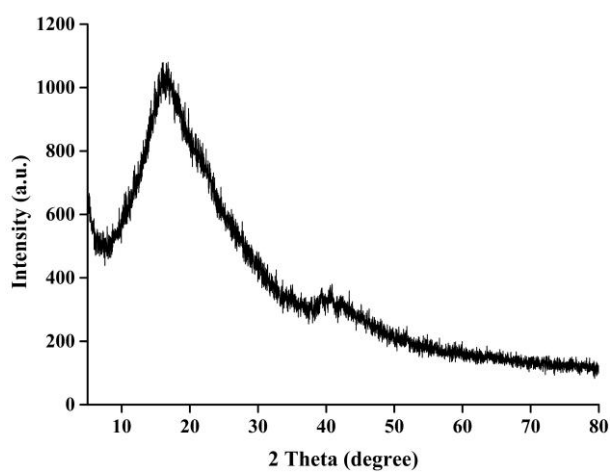

**Fig.S3** PXRD pattern of TAPOF

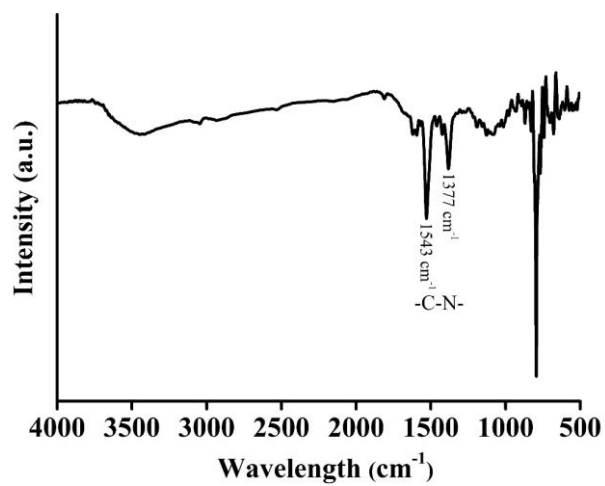

**Fig. S4** FT-IR spectrum of  $\text{Tb}^{3+}$ /TAPOF

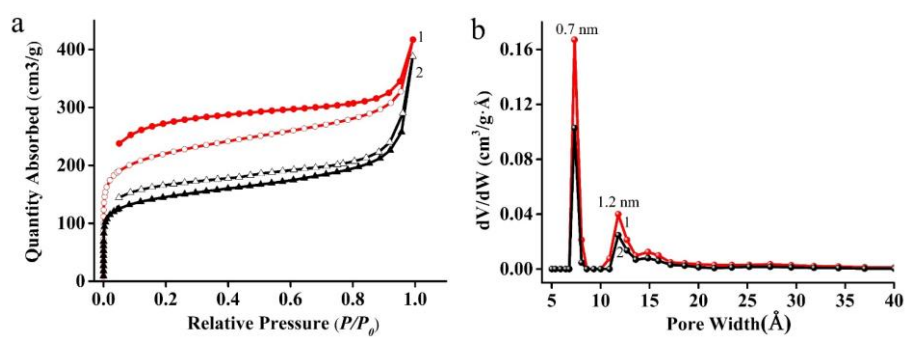

**Fig. S5** (a)  $\text{N}_2$  adsorption-desorption isotherms and (b) pore size distribution of TAPOF (curve 1) and  $\text{Tb}^{3+}$ /TAPOF (curve 2)

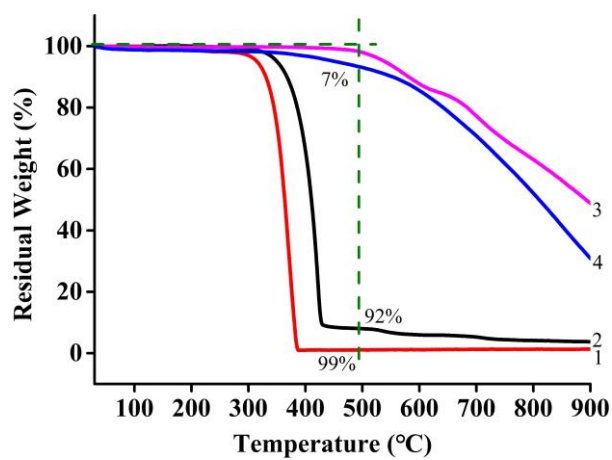

**Fig. S6** TGA curves of Tb<sup>3+</sup>/TAPOF (curve 4), TAPOF (curve 3), 2, 4, 6-tris (4-bromophenyl)-1, 3, 5-triazine (curve 1) and 1, 3, 5-tri (4-pinacolatoborolanophenyl) benzene (curve 2)

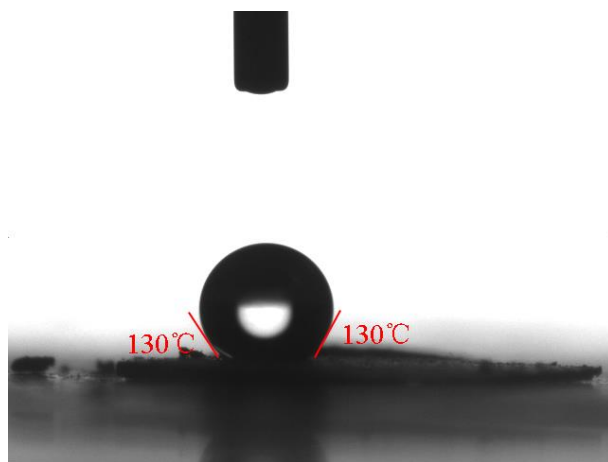

**Fig. S7** Water contact picture of Tb<sup>3+</sup>/TAPOF

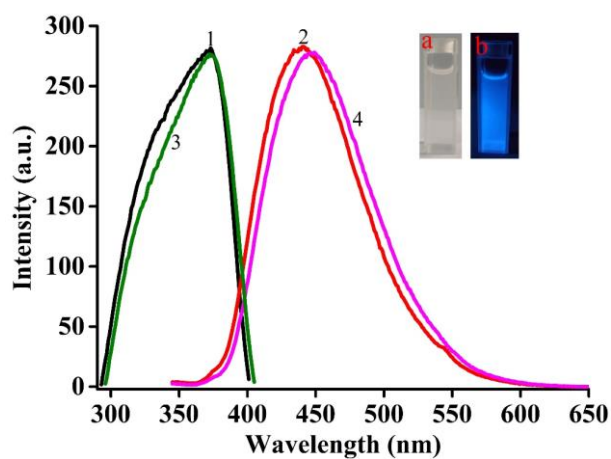

**Fig. S8** The excitation (curve 1) and emission (curve 2) spectra of  $\text{Tb}^{3+}/\text{TAPOF}$ ; The excitation (curve 3) and emission (curve 4) spectra of TAPOF. (Illustrations a-b are sunlight and fluorescent photographs of  $\text{Tb}^{3+}/\text{TAPOF}$  dispersed solution,  $\lambda_{\text{ex}}=365$  nm)

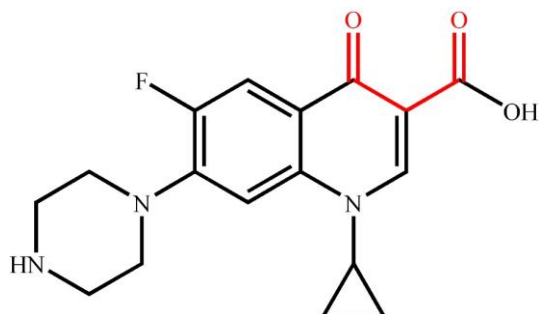

**Fig. S9** The formula of ciprofloxacin

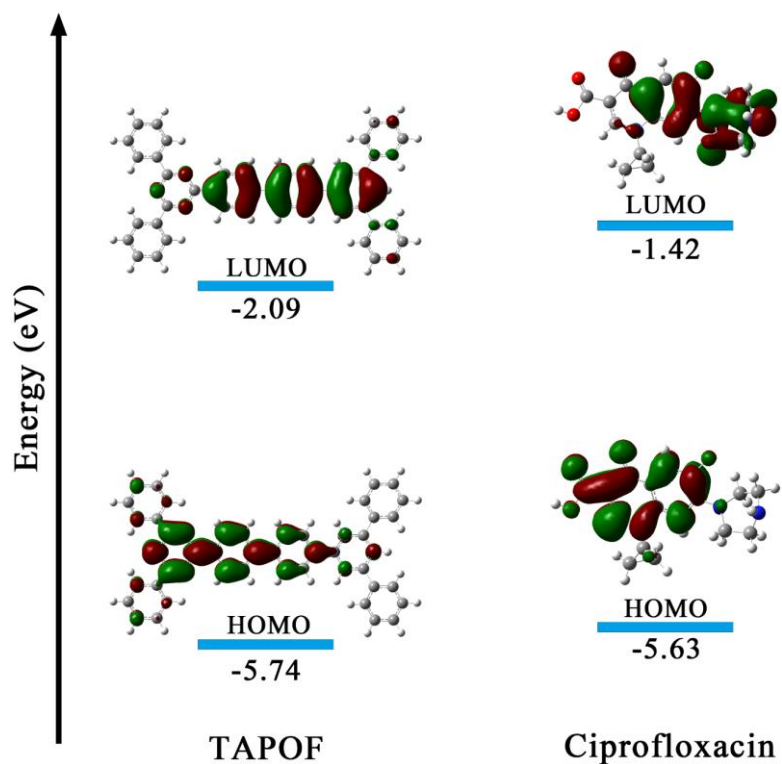

**Fig. S10** LUMO-HOMO energy profiles of TAPOF and ciprofloxacin

Table S1 Fluorescence lifetime and energy transfer efficiency of  $\text{Tb}^{3+}$ /TAPOF and  
floxacin compounds

| Names                   | Lifetime ( $\mu\text{s}$ ) | Energy transfer efficiency (%) |
|-------------------------|----------------------------|--------------------------------|
| $\text{Tb}^{3+}$ /TAPOF | 4.9                        | — <sup>a</sup>                 |
| Ciprofloxacin           | 338.9                      | 98.6                           |
| Difloxacin              | 40.5                       | 88.5                           |
| Marbofloxacin           | 26.2                       | 82.4                           |
| Ofloxacin               | 19.4                       | 76.3                           |
| Levofloxacin            | 16.3                       | 71.7                           |
| Fleroxacin              | 5.8                        | 20.4                           |
| Gatifloxacin            | 5.9                        | 22.4                           |
| Sparfloxacin            | 5.7                        | 20.0                           |
| Moxifloxacin            | 6.0                        | 23.7                           |

<sup>a</sup>: no value

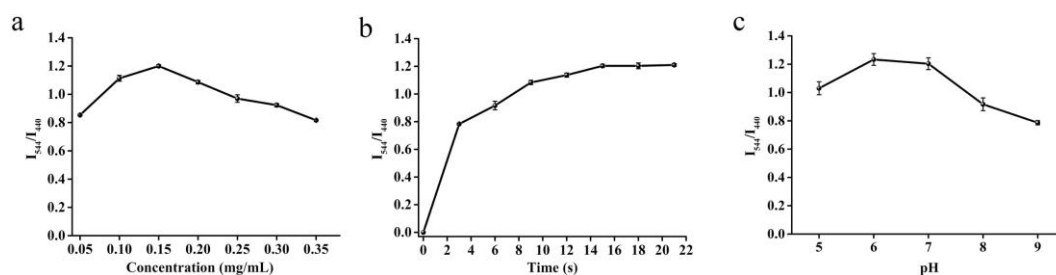

**Fig. S11** (a) Optimization of Tb<sup>3+</sup>/TAPOF dispersion concentration; (b) Optimization of mixing time between Tb<sup>3+</sup>/TAPOF dispersion and ciprofloxacin; (c) Effect of pH on the response of Tb<sup>3+</sup>/TAPOF towards the ciprofloxacin. ( $\lambda_{\text{ex}} = 330 \text{ nm}$ ,  $c = 1.5 \text{ } \mu\text{mol/L}$ )

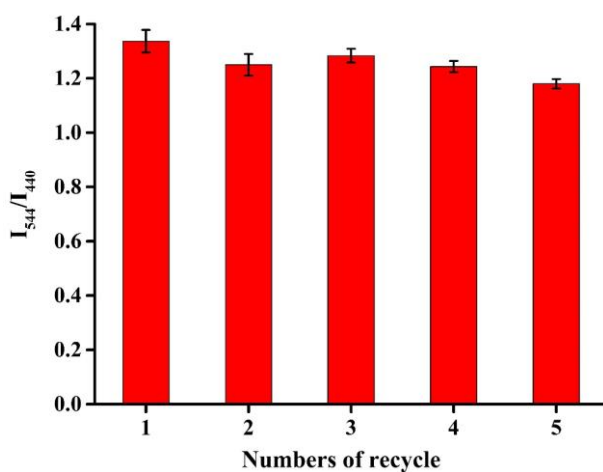

**Fig. S12** Study on the reuse times of Tb<sup>3+</sup>/TAPOF. ( $\lambda_{\text{ex}} = 330 \text{ nm}$ ,  $c = 1.5 \text{ } \mu\text{mol/L}$ )

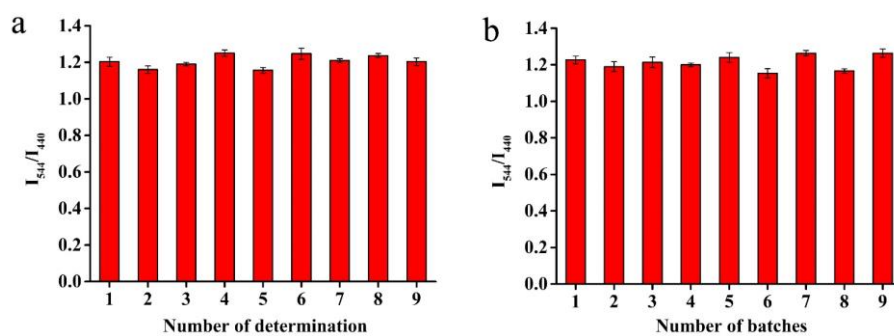

**Fig. S13** (a) Study on the reproducibility of Tb<sup>3+</sup>/TAPOF dispersion in the same batch;  
 (b) Study on the reproducibility of Tb<sup>3+</sup>/TAPOF dispersion in the different batches. ( $\lambda_{\text{ex}}$   
 = 330 nm,  $c$  = 1.5  $\mu\text{mol/L}$ )
